# Supplementary material for: Four linear CuII3 subunit-based coordination polymers with various inter-subunit connections, spin ground-states and intra-/inter-subunit magnetic couplings
Source: Royal Society of Chemistry journal article supplement (doi:10.1039/c4dt03741c), 2014-12-19
Supplement: c4dt03741c1.pdf [file c4dt03741c1.pdf]

## Electronic supplementary information

### Four linear Cu<sup>II</sup><sub>3</sub> subunit-based coordination polymers with various inter-subunit connections, spin ground-states and intra-/inter-subunit magnetic couplings

En-Cui Yang,<sup>a,\*</sup> Zhong-Yi Liu,<sup>a</sup> Si-Hang Chen,<sup>a</sup> Yan-Hong Su,<sup>a</sup> Yan-Yan Zhang,<sup>a</sup> Xiao-Jun Zhao<sup>a,b,\*</sup>

**Table S1** Selected bond distances (Å) and angles (°) for **1**<sup>a</sup>

|            |            |            |           |
|------------|------------|------------|-----------|
| Cu1–O5     | 1.928(3)   | Cu2–O6     | 1.880(3)  |
| Cu1–O6     | 1.911(4)   | Cu2–N2     | 1.986(4)  |
| Cu1–O2     | 1.969(3)   | Cu3–O5     | 1.892(3)  |
| Cu1–N1     | 2.009(4)   | Cu3–O1     | 1.973(3)  |
| Cu1–O7W    | 2.341(5)   |            |           |
| O5–Cu1–O6  | 91.53(15)  | O5–Cu1–O7W | 95.93(19) |
| O6–Cu1–O1  | 94.99(13)  | O2–Cu1–O7W | 85.31(17) |
| O5–Cu1–O2  | 95.35(14)  | N1–Cu1–O7  | 99.8(2)   |
| O2–Cu1–N1  | 86.80(15)  | O6–Cu2–N2  | 85.59(16) |
| O6–Cu1–O7W | 101.24(19) | O5–Cu2–N2A | 94.41(16) |
| O6–Cu1–N1  | 84.80(15)  | O5–Cu3–O1  | 89.69(14) |

<sup>a</sup> Symmetry codes: A – *x*, 1 – *y*, 2 – *z*.

**Table S2** Selected bond distances (Å) and angles (°) for **2** <sup>a</sup>

---

|             |           |            |            |
|-------------|-----------|------------|------------|
| Cu1–O8      | 1.901(3)  | Cu2–N2     | 1.967(3)   |
| Cu1–N1      | 2.012(3)  | Cu2–O3B    | 2.000(3)   |
| Cu2–O8      | 1.910(3)  | Cu2–O3     | 2.361(3)   |
| Cu2–O7      | 1.931(3)  |            |            |
| O8A–Cu1–N1A | 85.78(12) | O7–Cu2–O3B | 87.39(12)  |
| O8–Cu2–N2   | 86.30(13) | N2–Cu2–O3B | 93.73(12)  |
| O8–Cu1–N1   | 85.78(12) | O8–Cu2–O3  | 104.87(12) |
| O3B–Cu2–O3  | 76.75(11) | O7–Cu2–O3  | 96.68(13)  |
| O8–Cu2–O7   | 92.16(12) | N2–Cu2–O3  | 98.41(13)  |

<sup>a</sup> Symmetry codes: A –  $x, 1 - y, 1 - z$ ; B –  $x, 2 - y, 1 - z$ .

---

**Table S3** Selected bond distances (Å) and angles (°) for **3**<sup>a</sup>

|             |          |            |          |
|-------------|----------|------------|----------|
| Cu1–O1      | 1.871(4) | Cu1–N2     | 1.988(7) |
| Cu1–N6      | 1.990(7) | Cu1–N9     | 2.006(7) |
| Cu1–O6      | 2.553(7) | Cu1–N12    | 2.557(7) |
| Cu2–N12     | 2.362(8) | Cu2–N5     | 2.032(8) |
| Cu2–N1      | 1.994(7) |            |          |
| O1–Cu1–N9   | 85.5(3)  | N2–Cu1–N6  | 89.5(3)  |
| N6–Cu1–N9   | 94.4(3)  | O1–Cu1–N2  | 90.6(3)  |
| N1–Cu2–N5A  | 91.1(3)  | O1–Cu1–N2  | 90.6(3)  |
| N1–Cu2–N5   | 88.9(3)  | N1–Cu2–N12 | 88.4(3)  |
| N5–Cu2–N12A | 91.2(3)  | N5–Cu2–N12 | 88.8(3)  |
| N1A–Cu2–N12 | 91.6(3)  | N1–Cu2–N12 | 88.4(3)  |

<sup>a</sup> Symmetry codes: A –  $x, -y, 1 - z$ .

**Table S4** Selected bond distances (Å) and angles (°) for **4** <sup>a</sup>

---

|              |           |              |           |
|--------------|-----------|--------------|-----------|
| Cu1–O9       | 1.903(3)  | Cu1–O8       | 1.920(3)  |
| Cu1–N5       | 1.978(4)  | Cu1–O2       | 1.988(3)  |
| Cu1–O8B      | 2.492(5)  | Cu2–O5C      | 2.597(8)  |
| Cu2–O8       | 1.902(3)  | Cu2–O10      | 1.910(3)  |
| Cu2–O1       | 1.967(3)  | Cu2–N1       | 2.007(4)  |
| Cu3–O9       | 1.899(3)  | Cu3–O10A     | 1.916(4)  |
| Cu3–N6       | 2.009(4)  | Cu3–N2A      | 2.021(4)  |
| Cu3–O11      | 2.381(5)  | N5–Cu1–O2    | 86.56(15) |
| O9–Cu1–O8    | 95.47(14) | O9–Cu1–N5    | 86.61(16) |
| O8–Cu1–O2    | 91.27(14) | O1–Cu2–N1    | 87.56(15) |
| O8–Cu2–O10   | 94.06(14) | O8–Cu2–O1    | 91.29(14) |
| O10–Cu2–N1   | 86.01(16) | N2A–Cu3–O11  | 99.76(18) |
| O10A–Cu3–N6  | 94.41(16) | O9–Cu3–N2A   | 94.33(16) |
| O10A–Cu3–N2A | 85.38(16) | O9–Cu3–N6    | 85.65(16) |
| O9–Cu3–O11   | 93.83(17) | O10A–Cu3–O11 | 87.62(17) |
| N6–Cu3–O11   | 89.34(18) |              |           |

<sup>a</sup> Symmetry codes: A  $1/2 - x, y + 1/2, 1/2 - z$ ; B  $0.5 - x, 0.5 - y, 1 - z$ ; C  $1 - x, y, 1.5 - z$ .

---

**Table S5** Hydrogen-bonding parameters (Å, °) for **1–3**

| D–H...A                     | <i>d</i> (D–H) | <i>d</i> (H...A) | <i>d</i> (D...A) | ∠DHA   |
|-----------------------------|----------------|------------------|------------------|--------|
| <b>1</b>                    |                |                  |                  |        |
| N4–H4A...O4 <sup>A</sup>    | 0.90           | 2.056            | 2.935            | 165.17 |
| N4–H4B...O3 <sup>B</sup>    | 0.90           | 2.140            | 3.040            | 179.17 |
| O7–H7A...N4 <sup>B</sup>    | 0.851          | 2.210            | 3.003            | 155.04 |
| <b>2</b>                    |                |                  |                  |        |
| N(4)–H4''...O7 <sup>A</sup> | 0.90           | 2.52             | 3.2119           | 134    |
| N(4)–H4''...O <sup>B</sup>  | 0.90           | 2.31             | 3.0856           | 144    |
| O7–H7B...O1 <sup>C</sup>    | 0.84           | 2.43             | 3.0597           | 133    |
| O7–H7B...O2 <sup>C</sup>    | 0.84           | 1.84             | 2.6514           | 162    |
| O8–H8'...O1 <sup>C</sup>    | 0.84           | 2.15             | 2.9778           | 169    |
| <b>3</b>                    |                |                  |                  |        |
| N8–H8B...N4 <sup>A</sup>    | 0.900          | 2.390            | 3.092            | 135.00 |

Symmetry codes for **1**: <sup>A</sup> 1 – *x*, 1 – *y*, 1 – *z*; <sup>B</sup> – *x*, 1 – *y*, 1 – *z*. For **2**: <sup>A</sup> 1 + *x*, *y*, *z*; <sup>B</sup> 1 – *x*, 2 – *y*, 1 – *z*; <sup>C</sup> *x* – 1, *y*, *z*.

For **3**: <sup>A</sup> 1/2 – *x*, – *y*, *z* + 1/2.

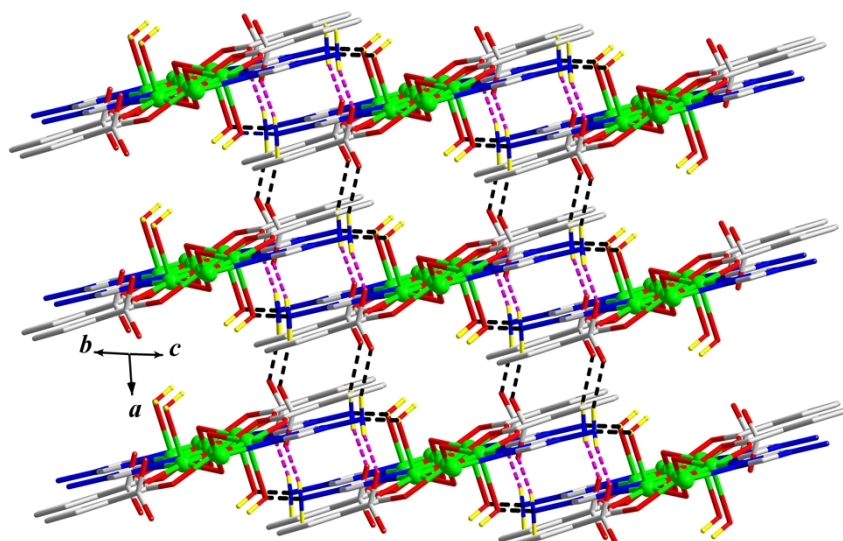

**Fig. S1** 3D supramolecular network of **1** by non-covalent N-H...O interactions.

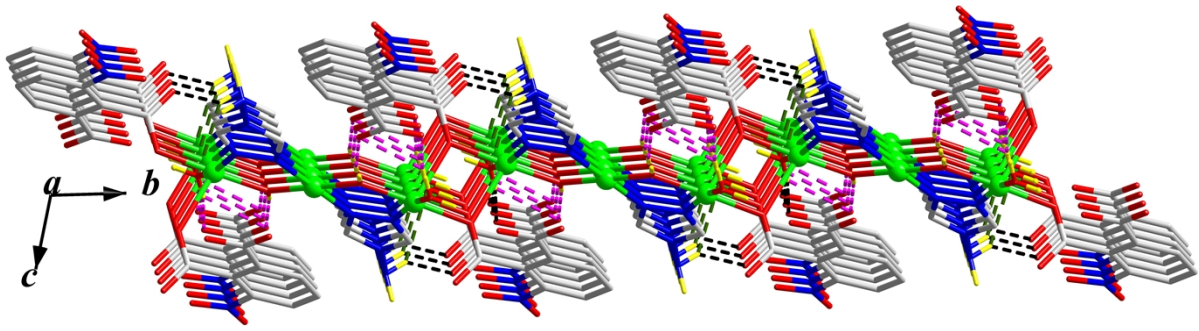

Fig. S2 2D layer of **2** by inter-chain O–H...O and N–H...O hydrogen-bonding interactions.

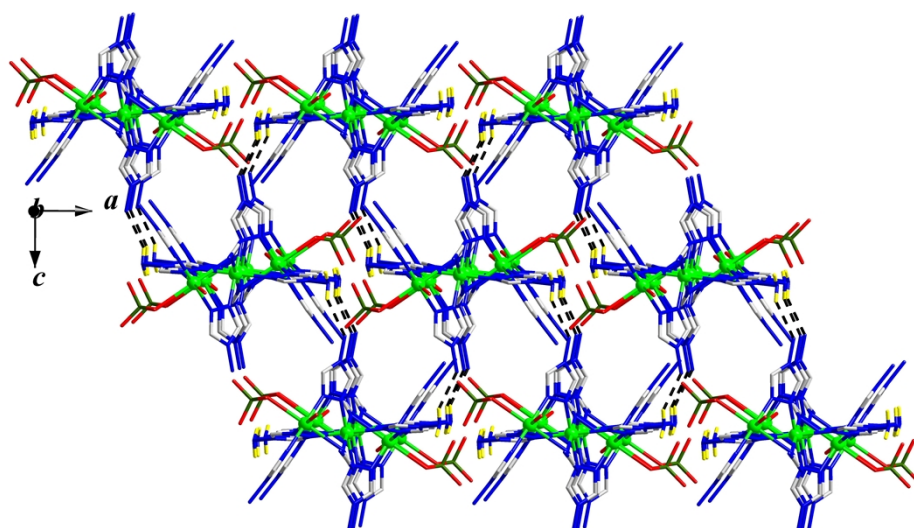

**Fig. S3** 3D supramolecular network of **3** generated by N–H...N hydrogen-bonding interactions.



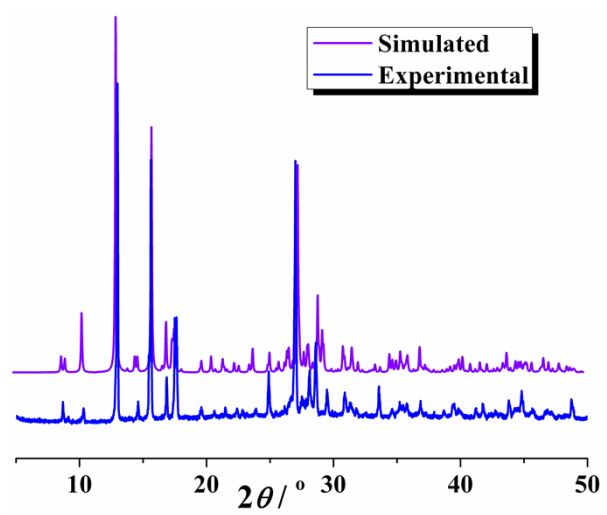

**Fig. S4** Simulated (violet) and experimental (blue) X-ray powder diffraction patterns for **1**.

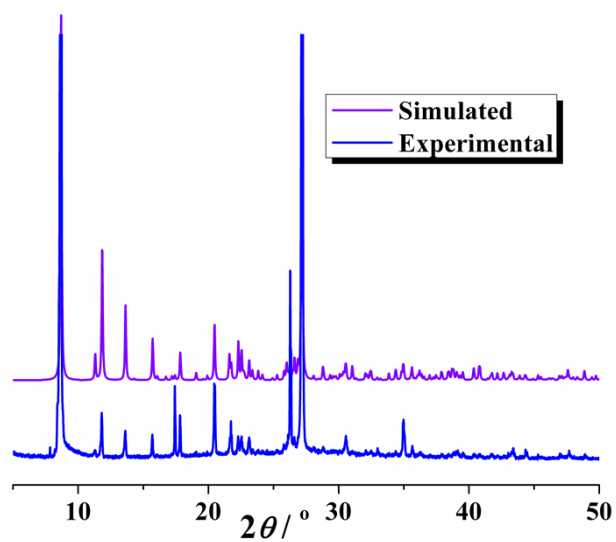

**Fig. S5** Simulated (violet) and experimental (blue) X-ray powder diffraction patterns for **2**.

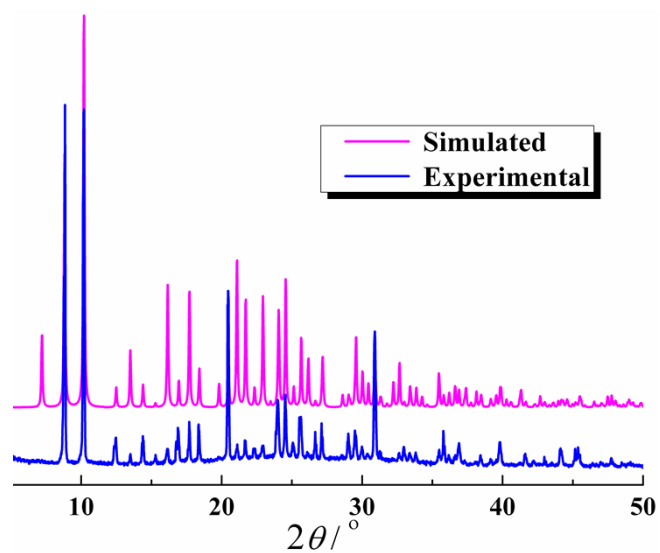

**Fig. S6** Simulated (purple) and experimental (blue) X-ray powder diffraction patterns for **3**.

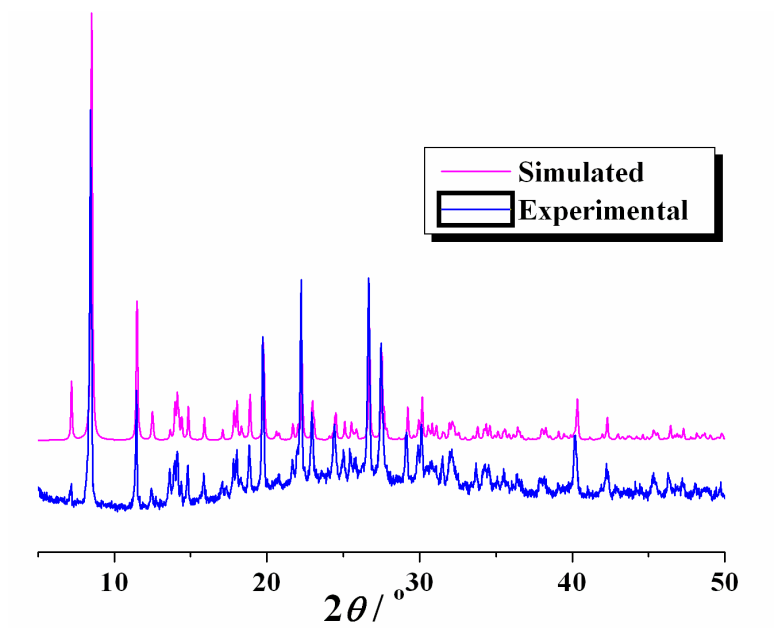

**Fig. S7** Simulated (purple) and experimental (blue) X-ray powder diffraction patterns for **4**.

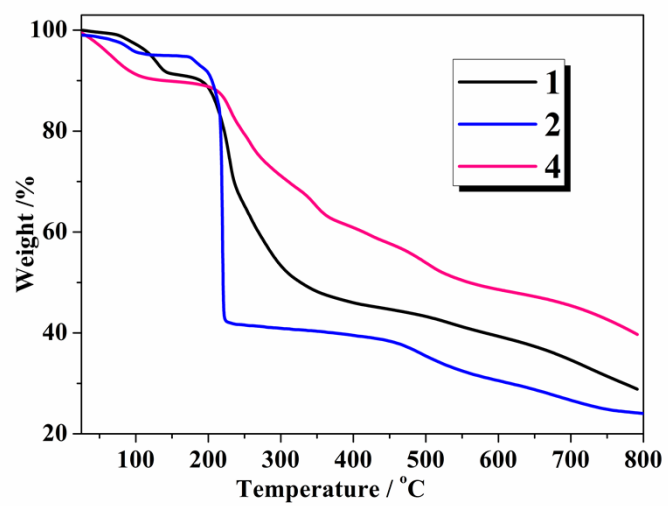

**Fig. S8** TG curves for complexes **1**, **2** and **4**.

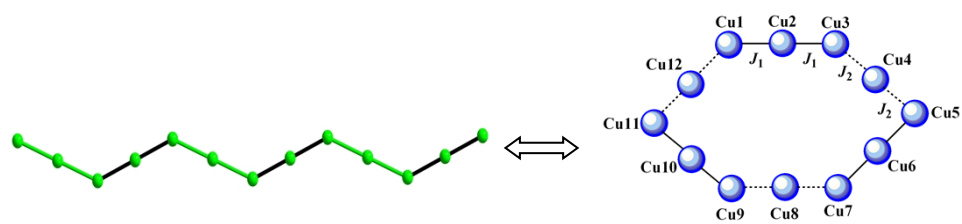

**Fig. S9** Schematic diagram representing the exchange interactions in **1**.

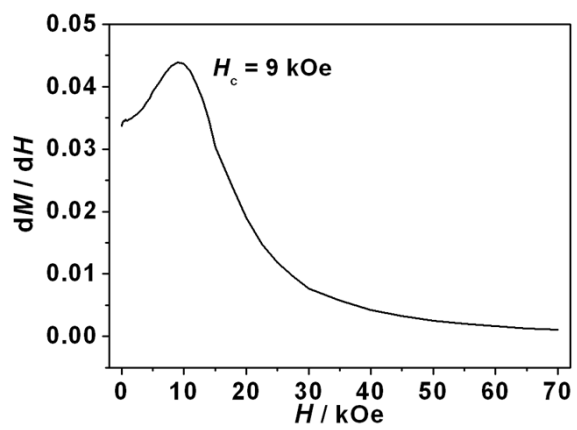

**Fig. S10** The  $dM/dH$  plot for 4.
